**The effects of fasting and cold exposure on metabolic rate and mitochondrial proton leak in liver and skeletal muscle of an amphibian, the cane toad *Bufo marinus***

M. Trzcionka, K. W. Withers, M. Klingenspor and M. Jastroch

10.1242/jeb.031260

There was an error published in *J. Exp. Biol.* **211**, 1911-1918.

In Fig. 4A, the symbols representing 'Liver fasted' and 'Liver fed' were transposed in the in-figure key. The black circles actually represent 'Liver fed', and the grey circles represent 'Liver fasted' (as stated in the figure caption and the text of the article). This error does not affect any of the conclusions of the article.

The authors apologise to readers for any inconvenience this may have caused.
